# Supplementary material for: Measurement report: Hygroscopicity of Size-Selective Aerosol Particles at Heavily Polluted Urban Atmosphere of Delhi: Impacts of Chloride Aerosol
Source: Copernicus journal article supplement (doi:10.5194/egusphere-2023-577), 2023-07-07
Supplement: Supplementary file 1 [file egusphere-2023-577-supplement.pdf]

## Measurement report: Hygroscopicity of Size-Selective Aerosol Particles at Heavily Polluted Urban Atmosphere of Delhi: Impacts of Chloride Aerosol

Anil Kumar Mandariya<sup>1,2</sup>, Ajit Ahlawat<sup>3</sup>, Mohd. M. V. Haneef<sup>1</sup>, Nisar A. Baig<sup>1</sup>, Kanan Patel<sup>4</sup>, Joshua S. Apte<sup>5</sup>, Lea Hildebrandt Ruiz<sup>4</sup>, Alfred Wiedensohler<sup>3\*</sup>, and Gazala Habib<sup>1\*</sup>

<sup>1</sup>Department of Civil Engineering, Indian Institute of Technology Delhi, New Delhi, India

<sup>2</sup>now at: Univ Paris Est Creteil and University Paris Cité, CNRS, LISA, F – 94010 Créteil, France

<sup>3</sup>Leibniz Institute for Tropospheric Research (TROPOS), Permoserstraße, 15 Leipzig, Germany

<sup>4</sup>Department of Civil, Architectural and Environmental Engineering, The University of Texas at Austin, Austin, Texas, USA

<sup>5</sup>McKetta Department of Chemical Engineering, The University of Texas at Austin, Austin, Texas, USA

Correspondence to: Gazala Habib (gazalahabib@civil.iitd.ac.in) and Alfred Wiedensohler (ali@tropos.de)

### Content:

Number of Pages: 9

Number of Figures: 11

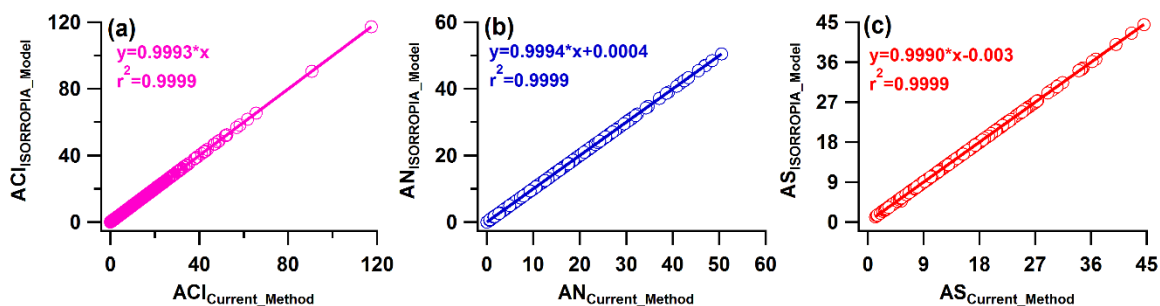

Figure S1: Regression plots between the calculated (a) ammonium chloride (ACI), (b) ammonium nitrate (AN), and (c) ammonium sulfate (AS) using ISORROPIA model and current modified ion-pairing scheme

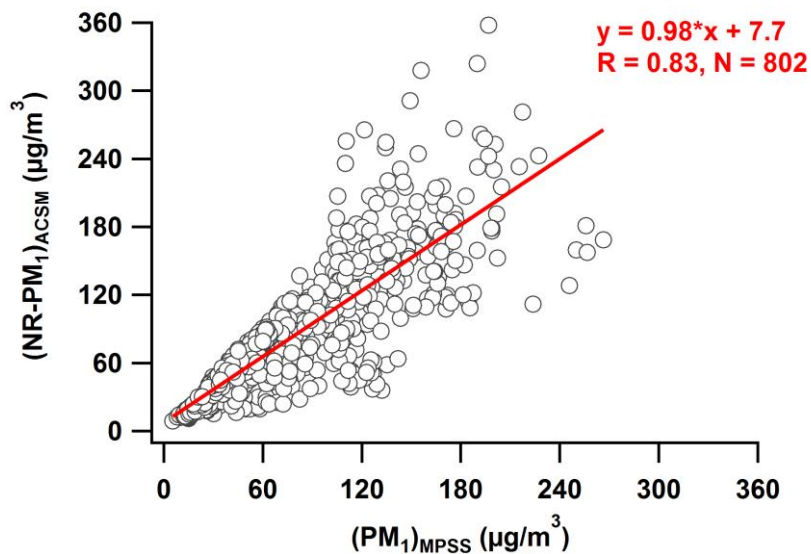

23

24 **Figure S2: Mass closure between non-refractive PM<sub>1</sub> and PM<sub>1</sub> measured from ACSM and MPSS, respectively**

25 **S.1 Details on PMF Analysis:**

26 **S.1.1 Prior to the analysis,**

- 27
- 28
- 29
- 30
- 31
1. spikes were removed from the dataset
  2. the mass fragments with “bad” SNR (<0.2) were removed from the data set
  3. the mass fragments with “weak” SNR (0.2-2) were down weighted
  4. the contributions at m/z 44, 18, 17 and 16 were down weighted because of their linear correlation from the standard fragmentation table

32 **S.1.2 Next,**

- 33
- 34
- 35
- 36
- 37
- 38
- 39
- 40
- 41
- 42
- the number of factors were varied from one to five in the PMF tool
  - the reduction in the ratio of the summation of scaled residuals (Q) to their expected value ( $Q_{expected} = mn - p(m + n)$ , where m corresponds to number of time steps (rows) and n corresponds to number of m/z (columns) in the input matrix, and p corresponds to the number of factors) “Q/Q<sub>expected</sub>” was considered to determine the number of factors. The solution where the addition of further factors led to little reduction in it was explored
  - increasing the number of factors beyond this point yielded unreasonable factor mass spectra due to factor splitting.
  - Different different SEED values (from 0 to 10) were explored to understand the effect of different pseudo random starts

43 • Different FPEAK values (from -1 to 1) were explored to understand the rotational freedom of solutions  
44 respectively.

45 We found a four-factor solution (hydrocarbon-like OA, “HOA”; oxidized biomass burning OA, “BBOA”; less-  
46 oxidized OA, “LO-OOA”; more-oxidized OA “MO-OOA) to best represent the data set. HOA mass spectra (MS)  
47 correlated well with reference (Ulbrich et al., 2009; Ng et al., 2011) HOA spectra (pearson R > 0.9) and BBOA  
48 MS correlated well with reference BBOA spectra (pearson R > 0.9) (see Fig S1 for MS and Fig S2 for correlation  
49 with reference spectra). While both MO-OOA and LO-OOA correlated well with reference OOA and LVOOA  
50 factors, MO-OOA was highly oxidated ( $f_{44} = 0.2$  compared to a value of 0.14 for LO-OOA). Further, SEED=0  
51 and FPEAK = 0 were chosen because non-zero values either had no significant effect on the solution or led to  
52 unreasonable factor MS/factor splitting.

53

54

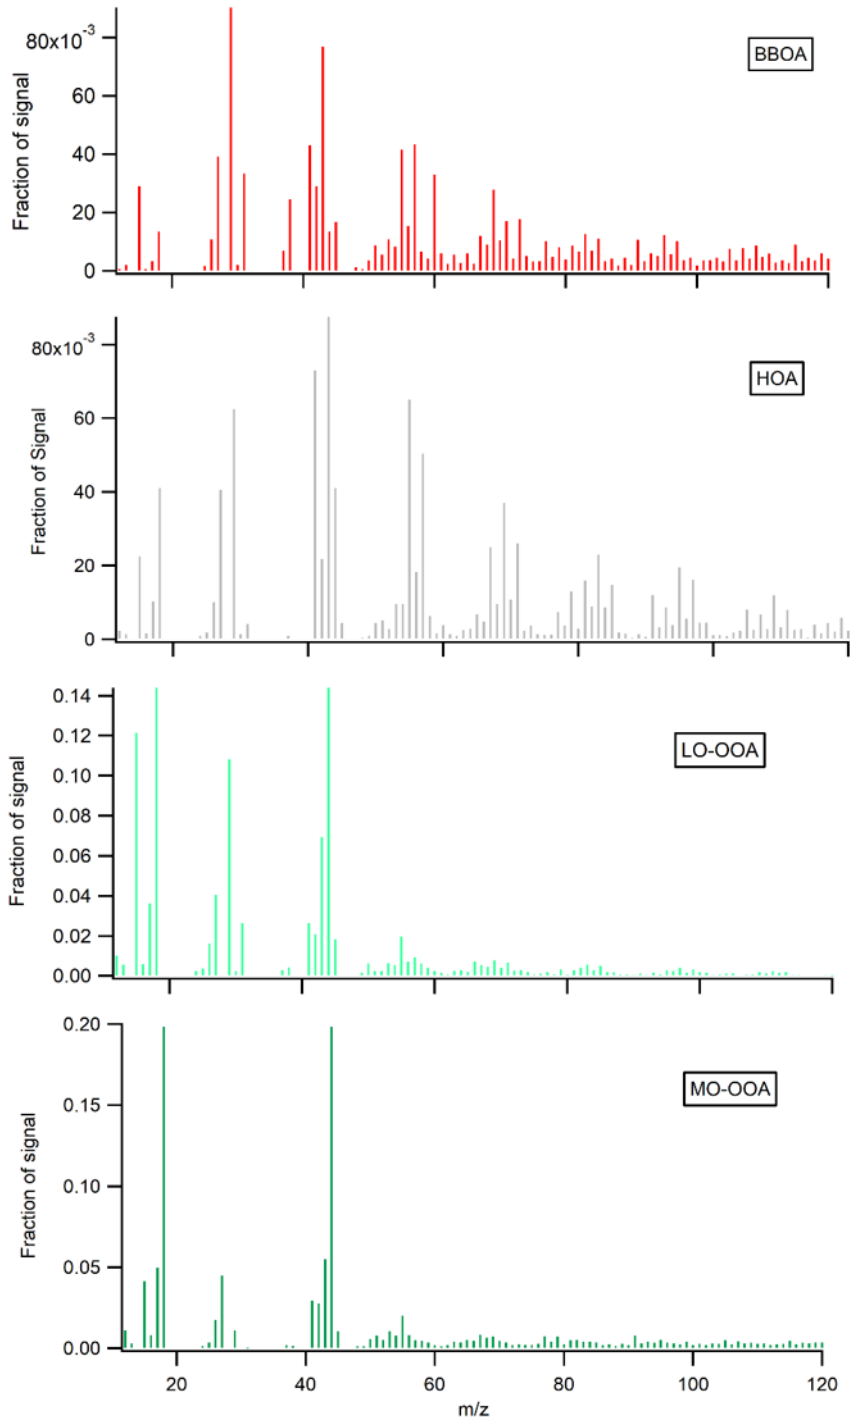

55

56 **Figure S3: Mass spectra of the PMF factors**

57

58

59

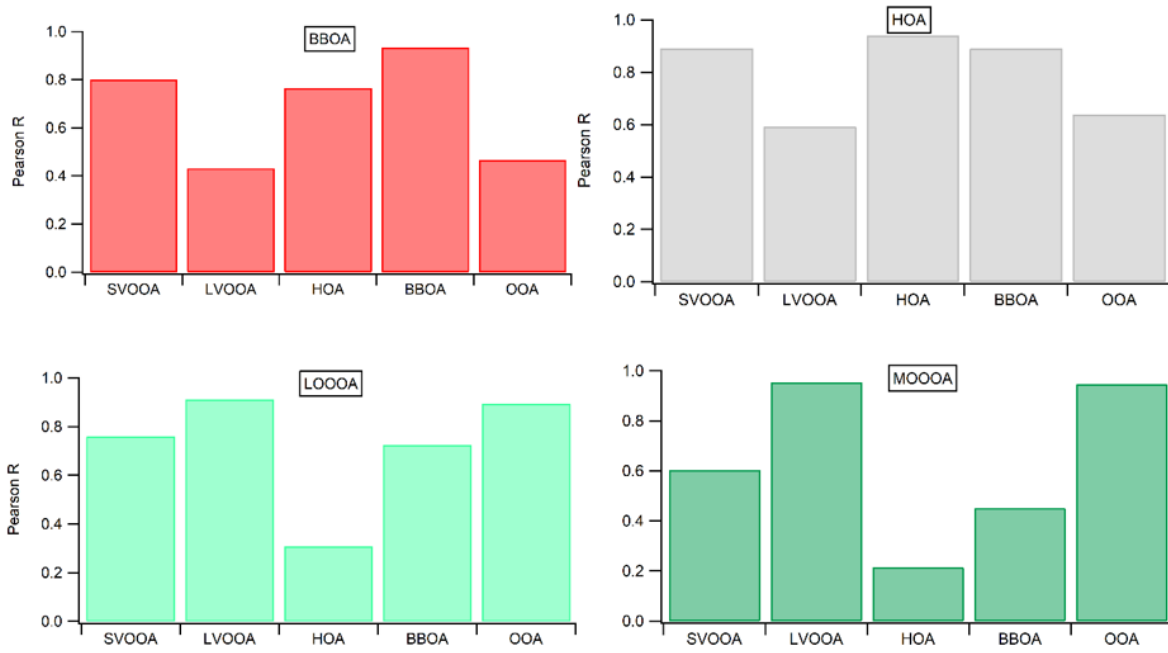

60

61 **Figure S4: Correlation of PMF factor mass spectra with reference mass spectra**

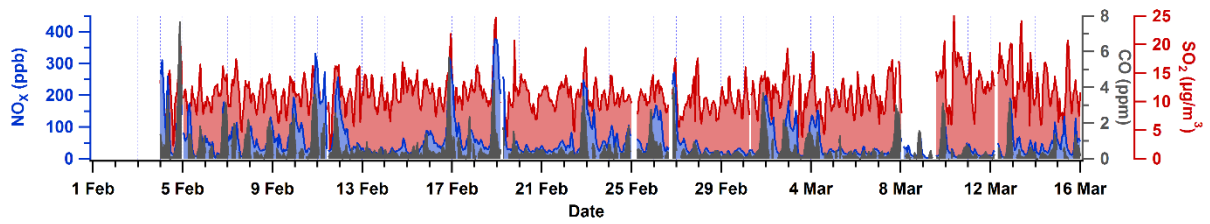

62

63 **Figure S5 Temporal variability in atmospheric NO<sub>x</sub>, CO, and SO<sub>2</sub> gases concentrations.**

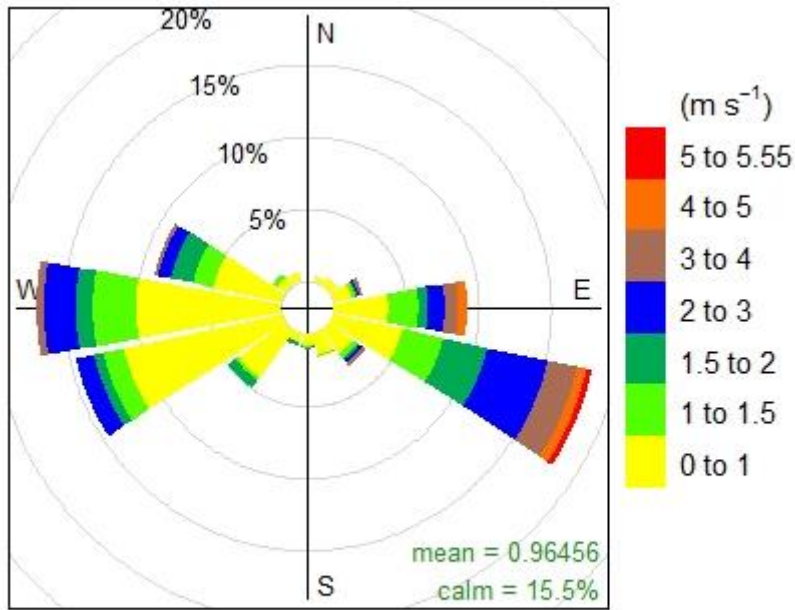

64 **Frequency of counts by wind direction (%)**

64

65 **Figure S6: Wind rose plot of hourly resolved wind speed (m/s) and wind direction (degree).**

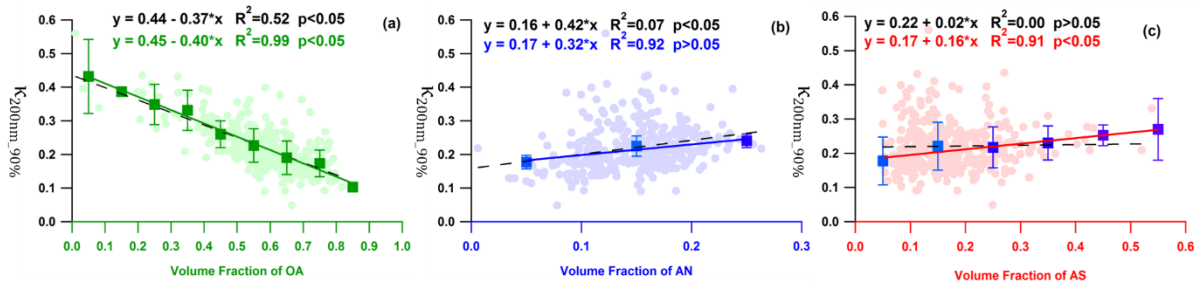

66

67 **Figure S7: Correlation plot for (a)  $\kappa_{200nm\_90\%}$  vs volume fraction of organic aerosol (VFOA), (b)  $\kappa_{200nm\_90\%}$  vs volume**  
 68 **fraction of ammonium nitrate (VFAN), and (c)  $\kappa_{200nm\_90\%}$  vs volume fraction of ammonium sulfate (VFAS).**

69

70

71

72

73

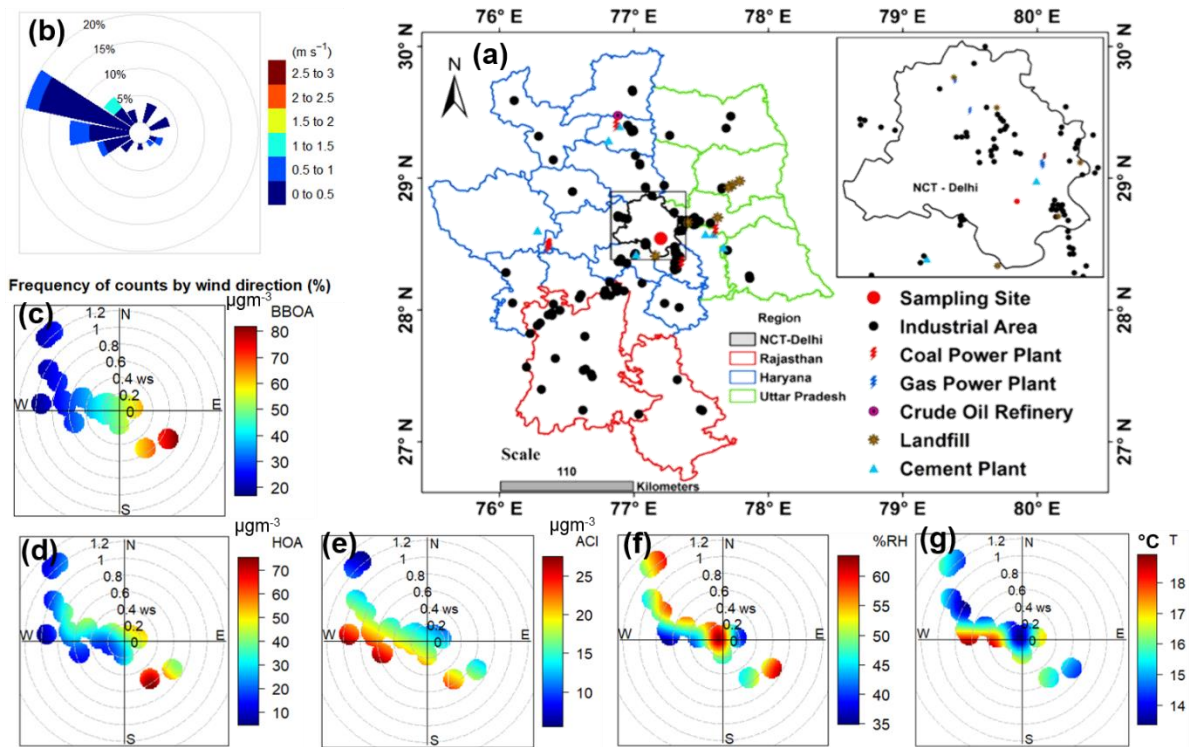

74

75 **Figure S8: Map of (a) Delhi showing various types of industries located in the region and nearby locations, (b) wind**  
 76 **rose diagram and conditional bi-polar plots showing variation in mass concentration of (c) biomass burning OA**  
 77 **(BBOA), (d) hydrocarbon like OA (HOA), (e) ammonium chloride (ACI), (f) % ambient relative humidity (RH), and**  
 78 **(g) ambient temperature (T), with wind direction (WD) and wind speed (WS) during H-BB events. A background map**  
 79 **showing various industrial locations was adapted from Rai et al. (2020).**

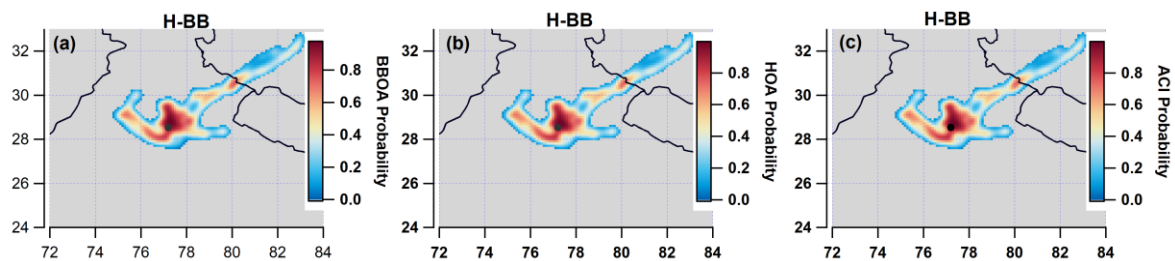

80

81 **Figure S9: Association of the mass concentration of various chemical species (a) biomass burning OA (BBOA), (b)**  
 82 **hydrocarbon like OA (HOA), (c)  $\text{NH}_4\text{Cl}$  (ACI) of  $\text{PM}_{10}$  with 48 hr air mass back trajectories (BT) for H-BB period.**

83

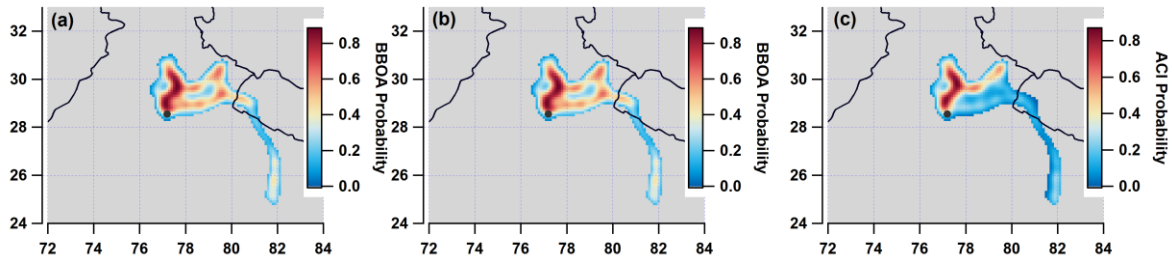

84

85 **Figure S10: Association of the mass concentration of various chemical species (a) biomass burning OA (BBOA), (b)**  
 86 **hydrocarbon like OA (HOA), (c)  $\text{NH}_4\text{Cl}$  (ACI) of  $\text{PM}_{10}$  with 48 hr air mass back trajectories (BT) for H-HOA period.**

87

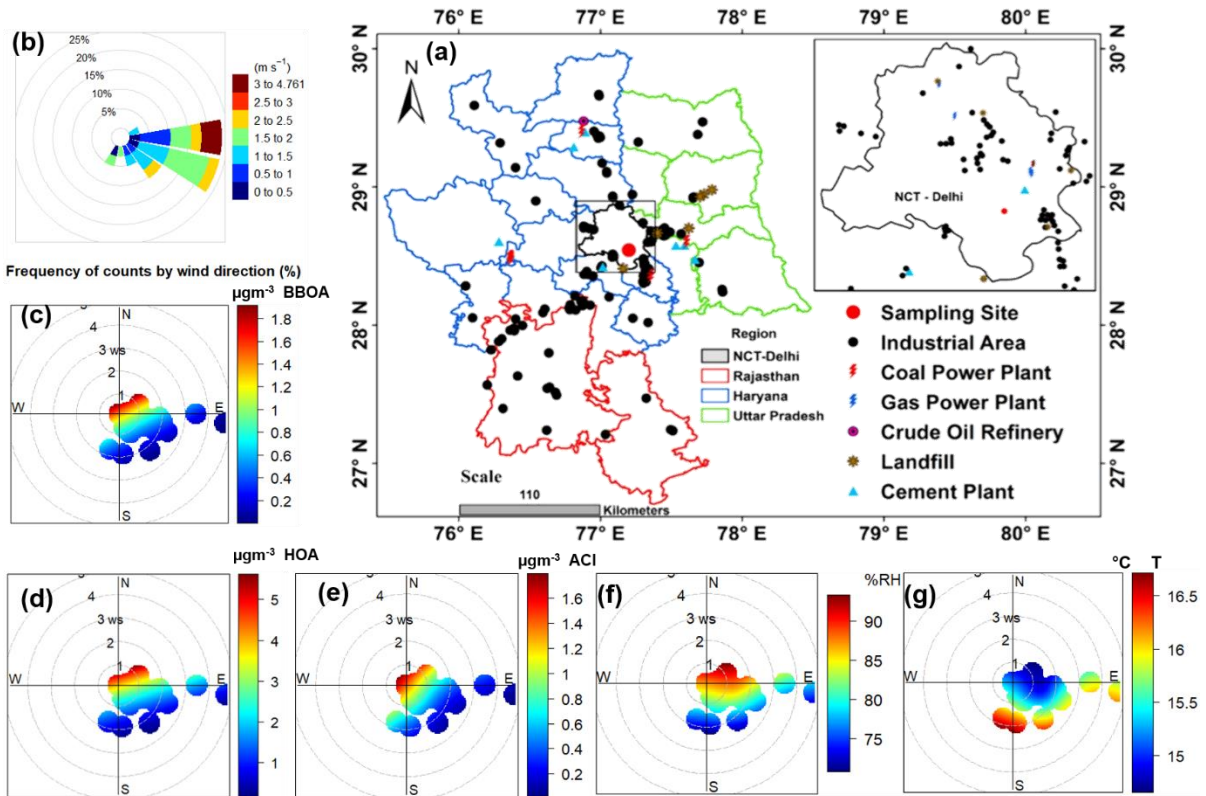

88

89 **Figure S11 Map of (a) Delhi showing various types of industries located in the region and nearby locations, (b) wind**  
 90 **rose diagram and conditional bi-polar plots showing variation in mass concentration of (c) biomass burning OA**  
 91 **(BBOA), (d) hydrocarbon like OA (HOA), (e) ammonium chloride (ACI), (f) % ambient relative humidity (RH), and**  
 92 **(g) ambient temperature (T), with wind direction (WD) and wind speed (WS) during relatively Clean periods. A**  
 93 **background map showing various industrial locations was adapted from Rai et al. (2020).**

94



95 References

- 96 Rai, P., Furger, M., El Haddad, I., Kumar, V., Wang, L., Singh, A., Dixit, K., Bhattu, D., Petit, J.-E., Ganguly,  
97 D., Rastogi, N., Baltensperger, U., Tripathi, S. N., Slowik, J. G. and Prévôt, A. S. H.: Real-time measurement  
98 and source apportionment of elements in Delhi's atmosphere, *Sci. Total Environ.*, 742, 140332,  
99 doi:10.1016/j.scitotenv.2020.140332, 2020.

100
